# Supplementary material for: TGF-β-induced activation of conjunctival fibroblasts is modulated by FGF-2 and substratum stiffness
Source: PubMed Central journal article supplement (PMC7673499; doi:10.1371/journal.pone.0242626), 2020-11-18

# Figure 1-A

used for figure

Top:  $\alpha$ -SMA  
Bottom:  $\beta$ -actin

① control ② 10 ng/ml FGF-2 ③ 50 ng/ml FGF-2 ④ 100 ng/ml FGF-2  
⑤ TGF ⑥ TGF+ 10 ng/ml FGF-2 ⑦ TGF+ 50ng/ml FGF-2 ⑧ TGF+100 ng/ml FGF-2

① ② ③ ④ ⑤ ⑥ ⑦ ⑧

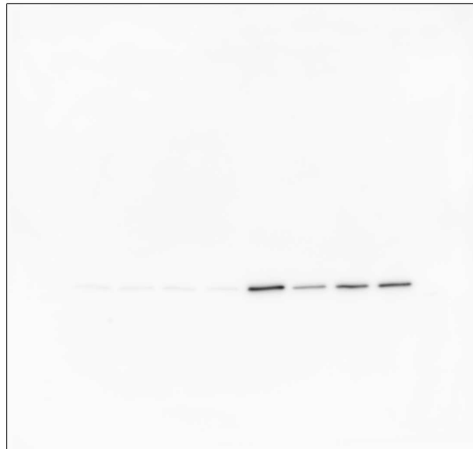

① ② ③ ④ ⑤ ⑥ ⑦ ⑧

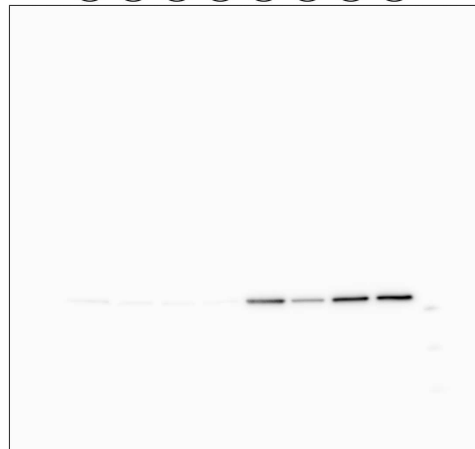

① ② ③ ④ ⑤ ⑥ ⑦ ⑧

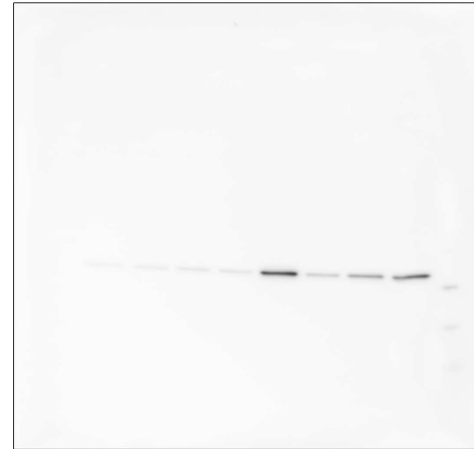

① ② ③ ④ ⑤ ⑥ ⑦ ⑧

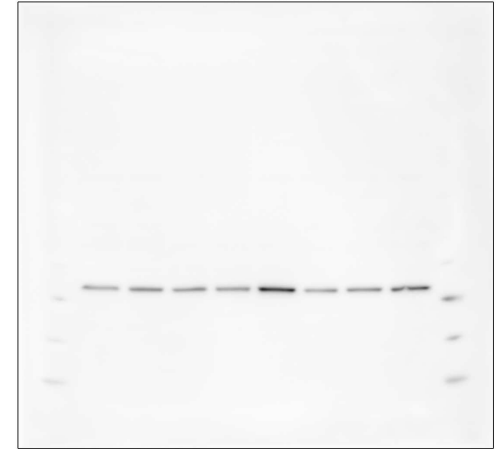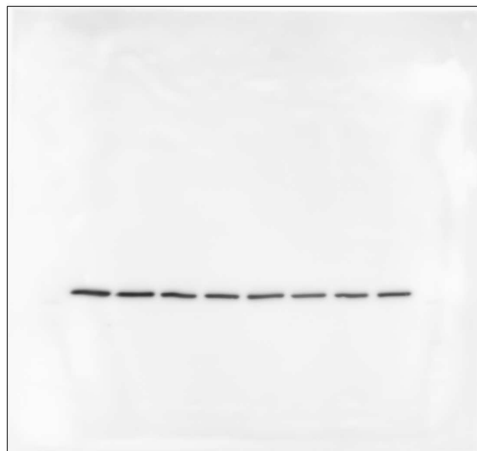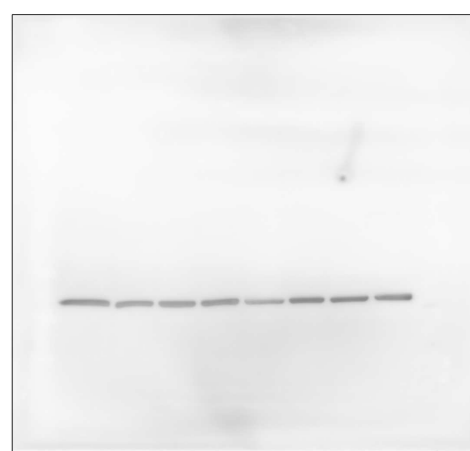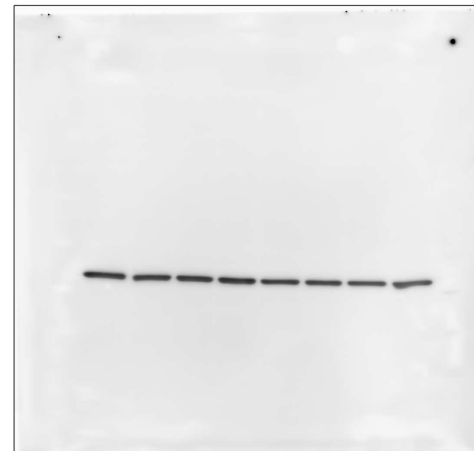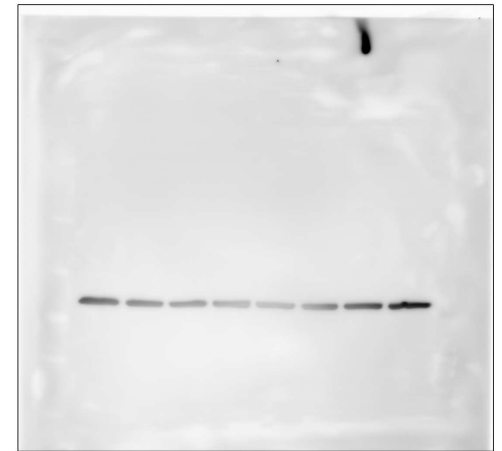

# Figure 1-B

Top:  $\alpha$ -SMA

Bottom:  $\beta$ -actin

used for figure

①②③④⑤⑥⑦⑧

①②③④⑤⑥⑦⑧

①②③④⑤⑥⑦⑧

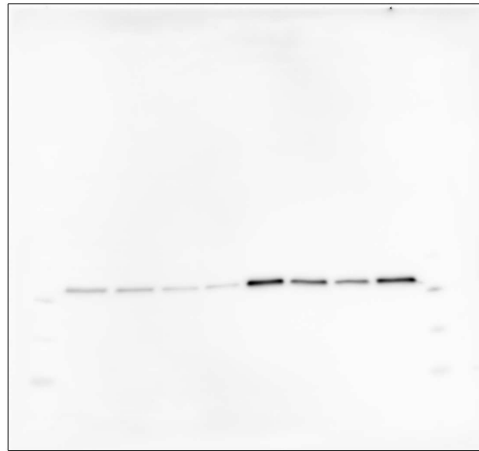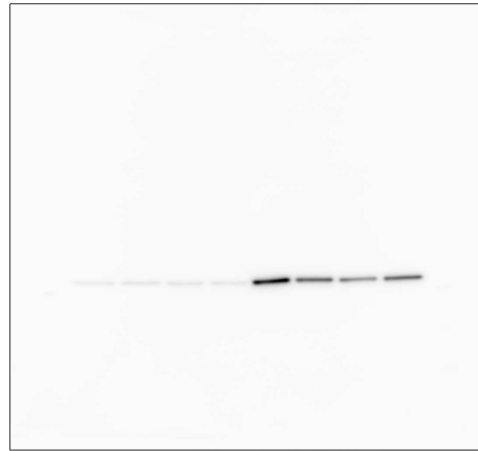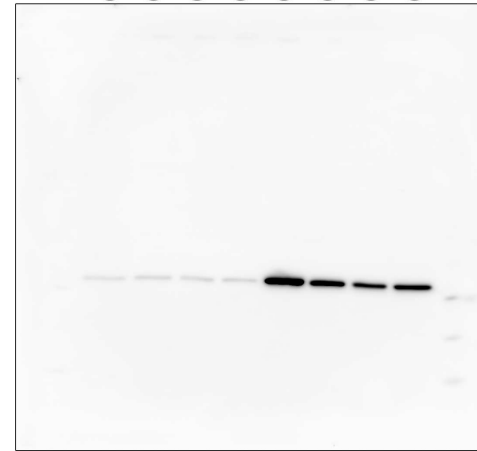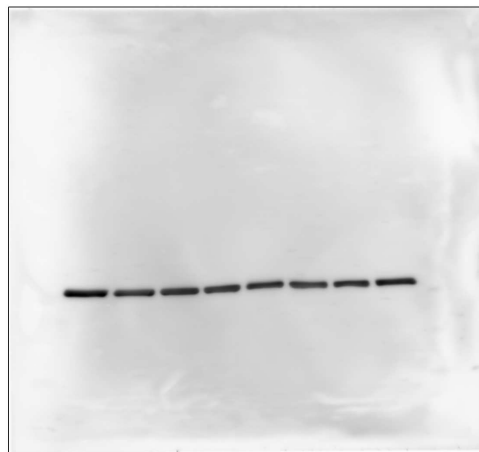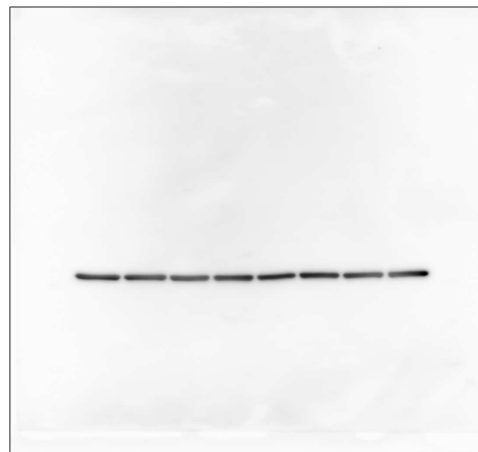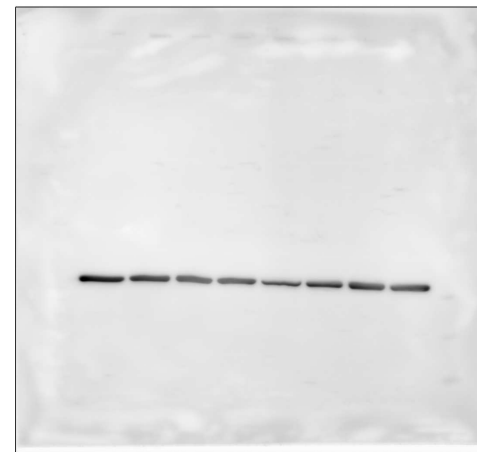

- ① control
- ② 2 ng/ml FGF-2
- ③ 10 ng/ml FGF-2
- ④ 50 ng/ml FGF-2
- ⑤ TGF ⑥ TGF + 2 ng/ml FGF-2
- ⑦ TGF + 10 ng/ml FGF-2
- ⑧ TGF + 50 ng/ml FGF-2

# Figure 1-C

TOP:  $\alpha$ -SMA

Bottom:  $\beta$ -actin

used for figure

①②③④⑤⑥⑦⑧

①②③④⑤⑥⑦⑧

①②③④⑤⑥⑦⑧

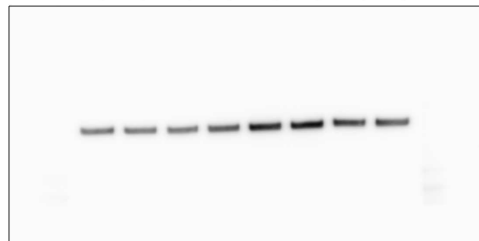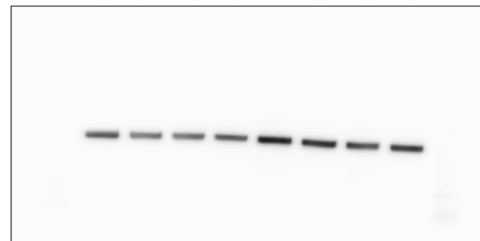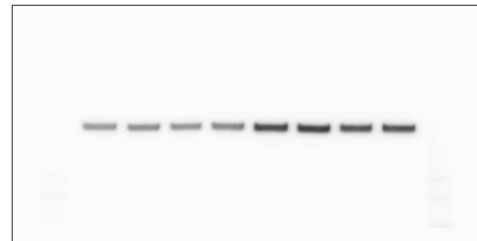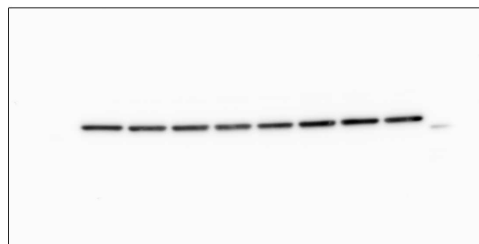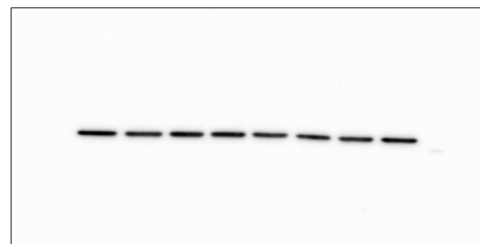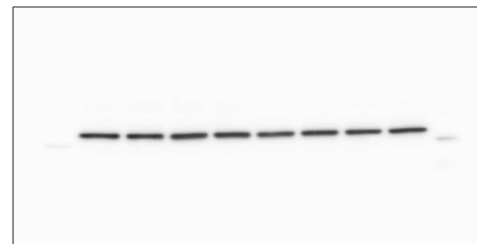

- ① control
- ② 2 ng/ml FGF-2
- ③ 10 ng/ml FGF-2
- ④ 50 ng/ml FGF-2
- ⑤ TGF
- ⑥ TGF+ 2 ng/ml FGF-2
- ⑦ TGF+ 10ng/ml FGF-2
- ⑧ TGF+50 ng/ml FGF-2

# Figure 1-D

Top: fibronectin  
Bottom:  $\beta$ -actin

used for figure

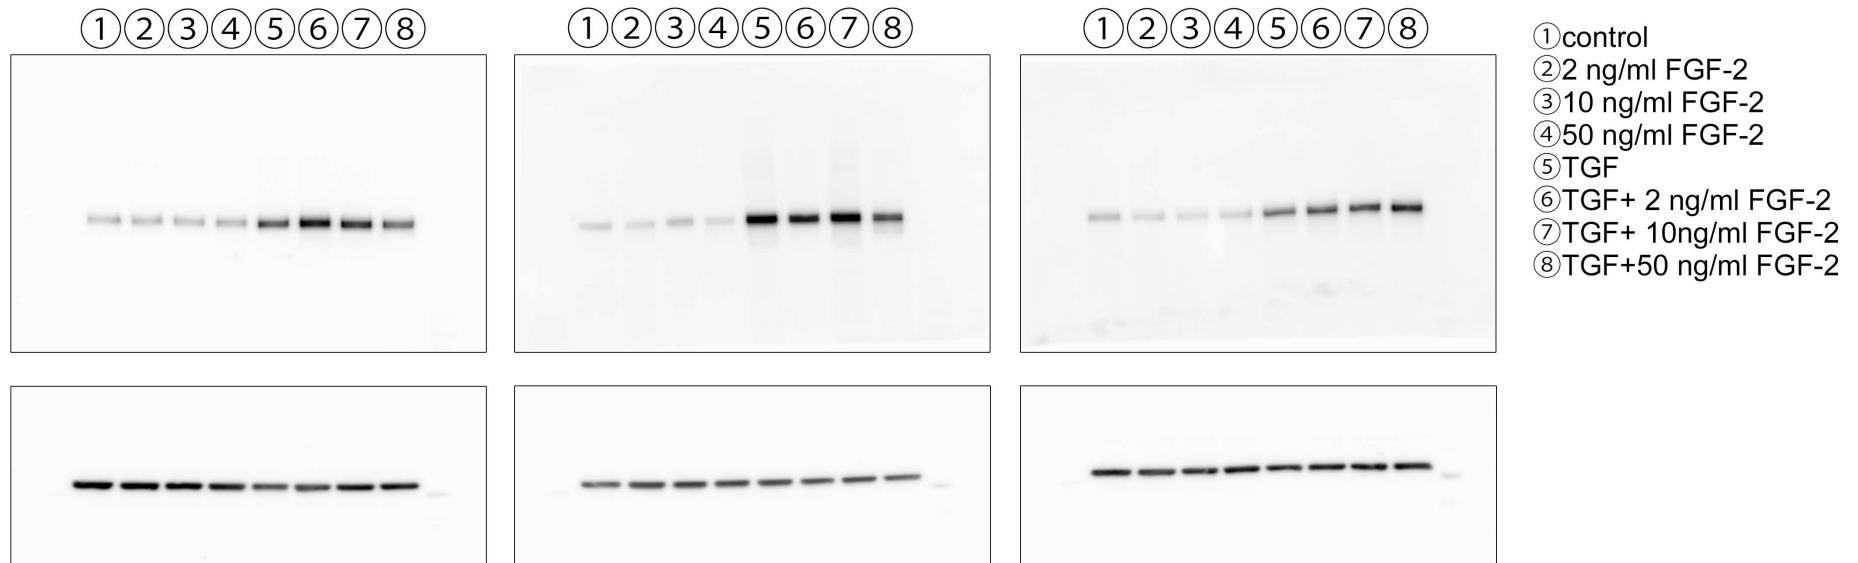

Figure 2-A  
Top:  $\alpha$ -SMA  
Bottom:  $\beta$ -actin

①②③④①②③④①②③④

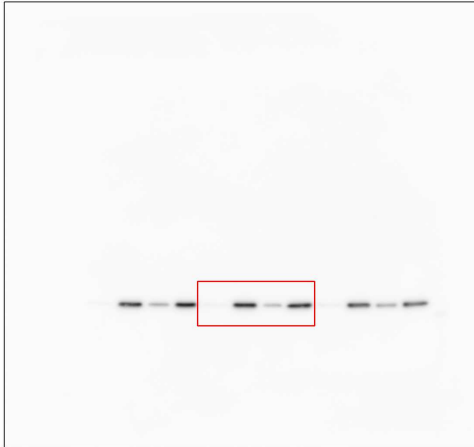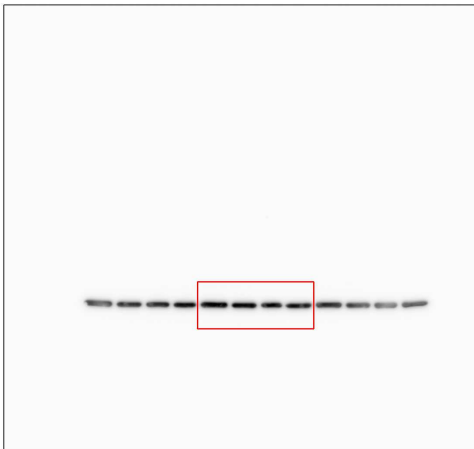

Figure 2-B  
Top: COL 1  
Bottom:  $\beta$ -actin

①②③④①②③④①②③④

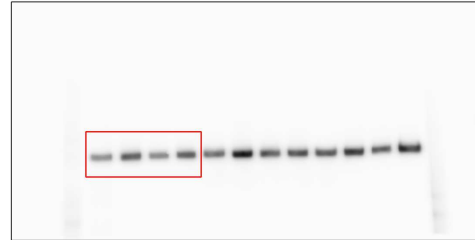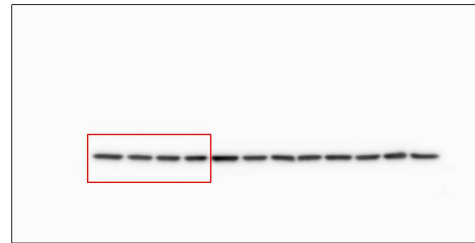

Figure 2-C  
Top: fibronectin  
Bottom:  $\beta$ -actin

①②③④①②③④①②③④

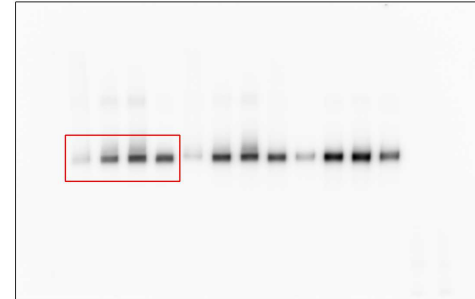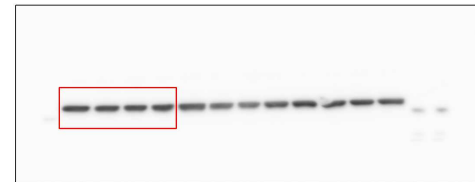

- ① control
- ② TGF
- ③ TGF+FGF-2
- ④ TGF+FGF-2+PD173074

Three samples were electrophoresed per gel.  
The part used in the figure is shown in a red frame.

Figure 4-A

Top: YAP (70 kDa)  
Bottom:  $\beta$ -actin

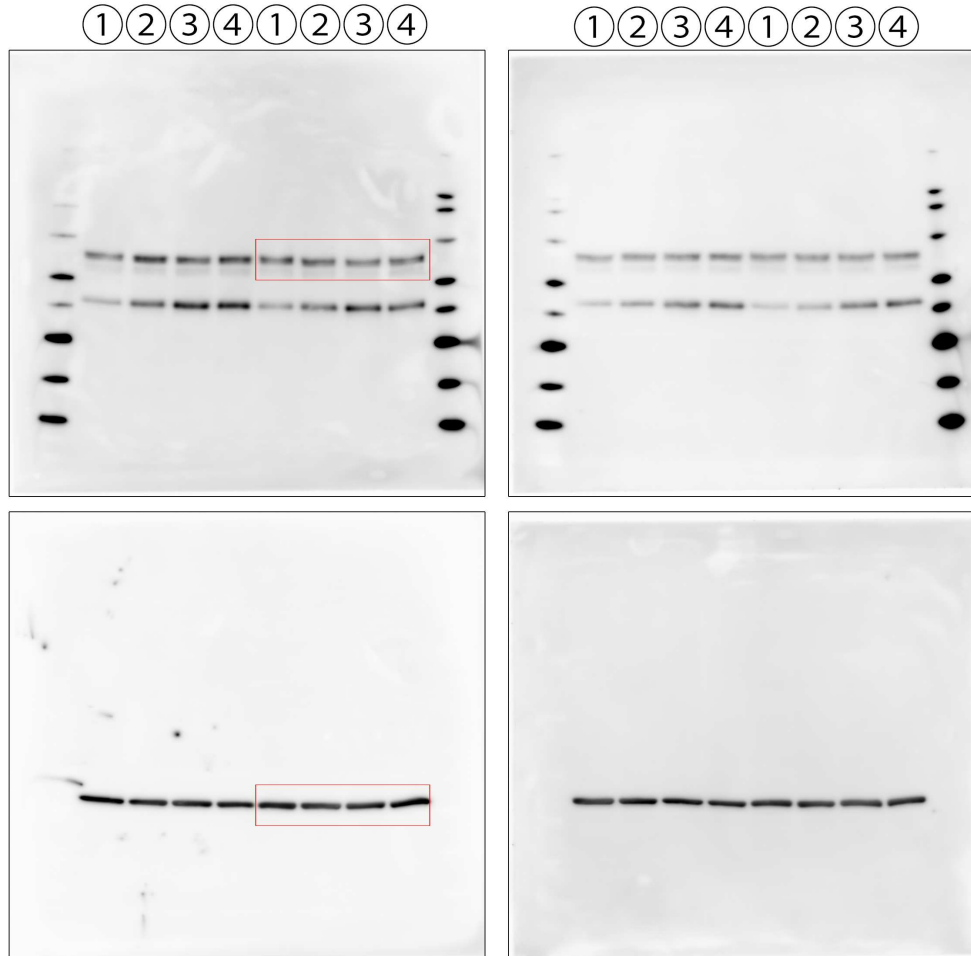

- ① control
- ② FGF-2
- ③ TGF
- ④ TGF+FGF-2

Two samples were electrophoresed per gel. (4 samples in total)

The part used in the figure is shown in a red frame.

Figure 4-B Top: TAZ  
Bottom:  $\beta$ -actin

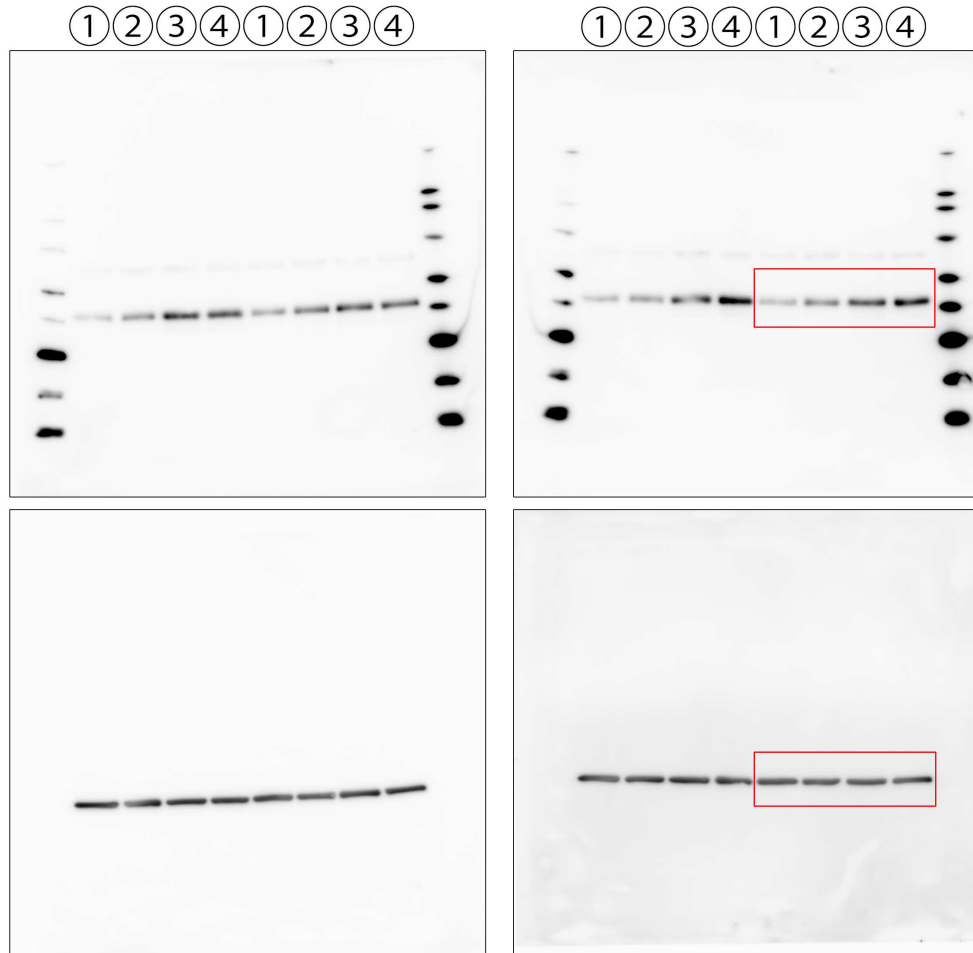

- ① control
- ② FGF-2
- ③ TGF
- ④ TGF+FGF-2

Two samples were electrophoresed per gel. (4 samples in total)

The part used in the figure is shown in a red frame.

**Figure 5-A** Top:  $\alpha$ -SMA  
Bottom:  $\beta$ -actin

used for figure

①②③④⑤⑥

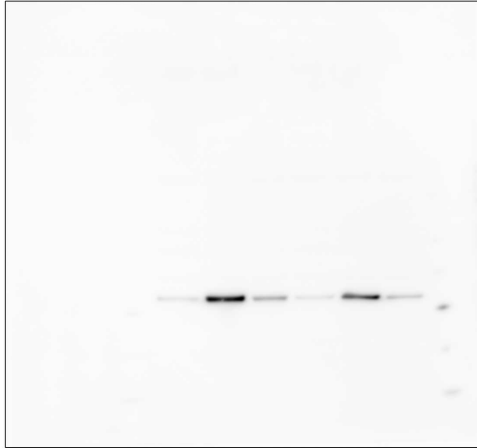

①②③④⑤⑥

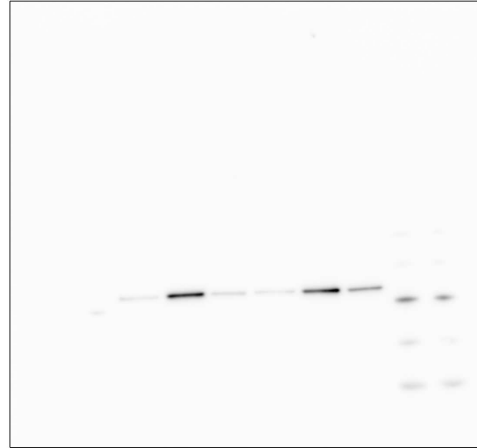

①②③④⑤⑥

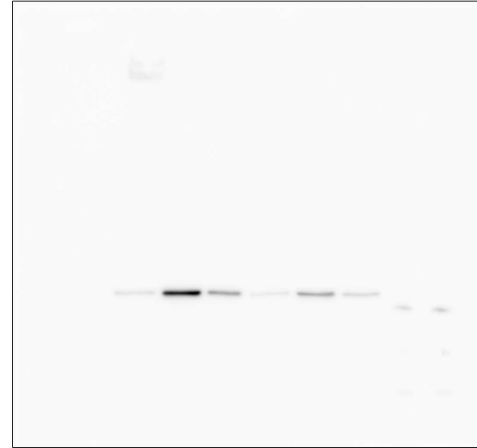

- ① 6well-control
- ② 6well-TGF
- ③ 6well-TGF+FGF-2
- ④ 64 kPa-control
- ⑤ 64 kPa-TGF
- ⑥ 64 kPa-TGF+FGF-2

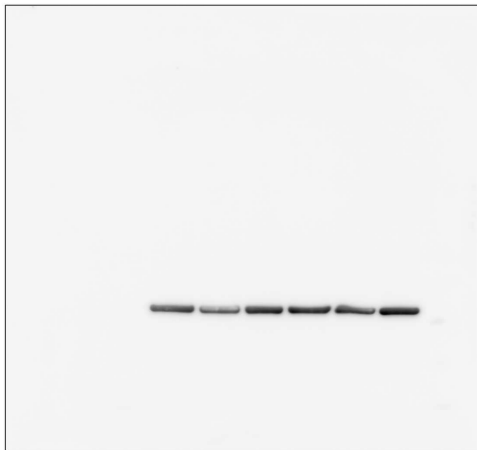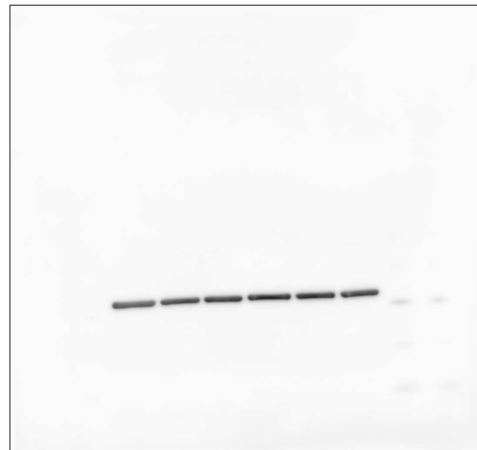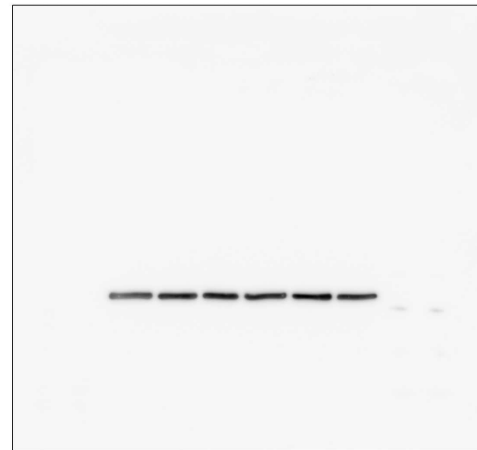



# Figure 5-B

Top:  $\alpha$ -SMA  
Bottom:  $\beta$ -actin

used for figure

①②③④⑤⑥

①②③④⑤⑥

①②③④⑤⑥

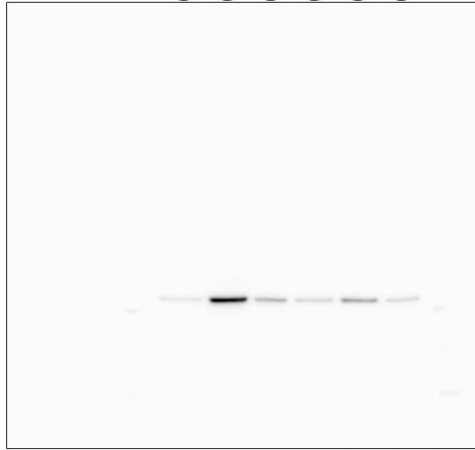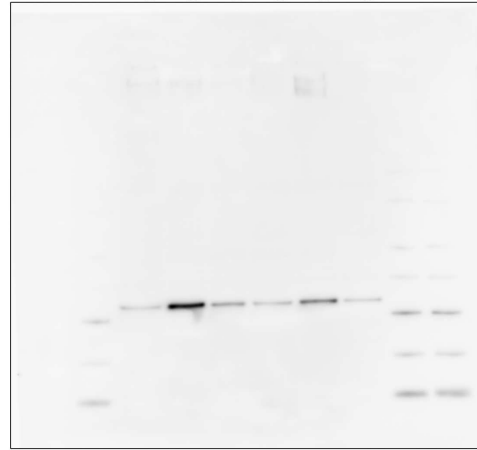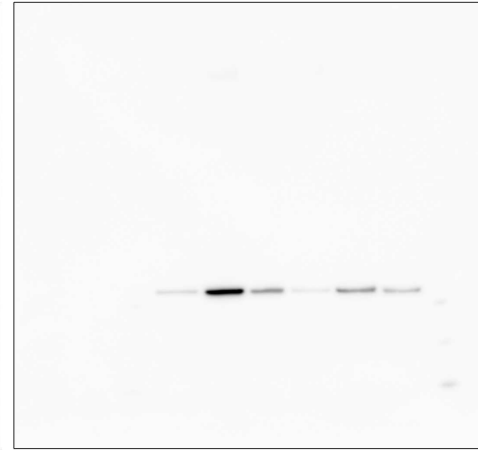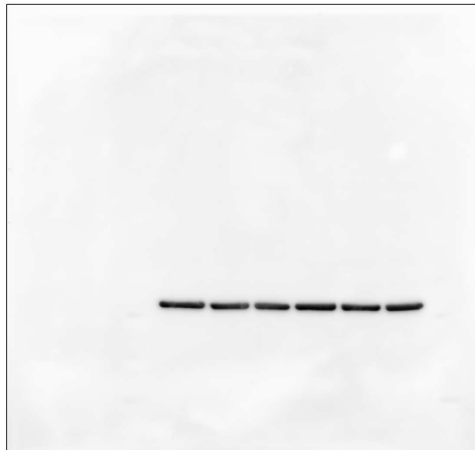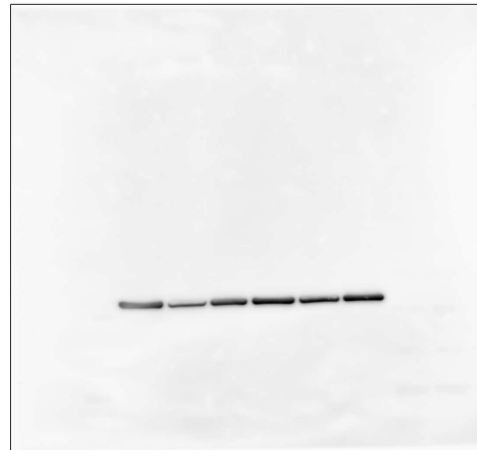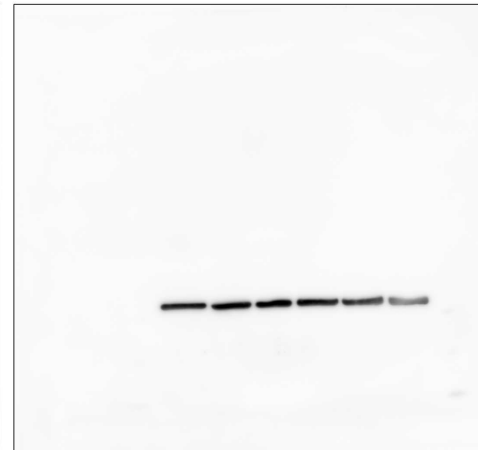

- ① 6well-control
- ② 6well-TGF
- ③ 6well-TGF+FGF-2
- ④ 0.2 kPa-control
- ⑤ 0.2 kPa-TGF
- ⑥ 0.2 kPa-TGF+FGF-2

# Figure 5-C

Top:  $\alpha$ -SMA  
Bottom:  $\beta$ -actin

used for figure

①②③④⑤⑥

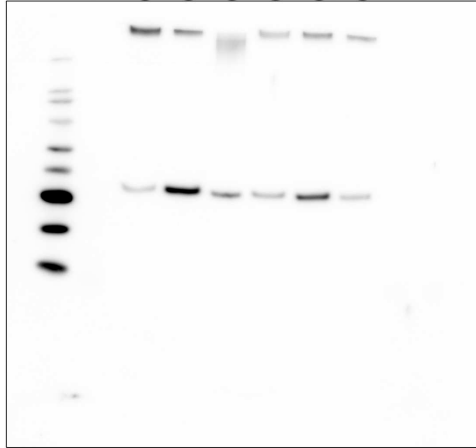

①②③④⑤⑥

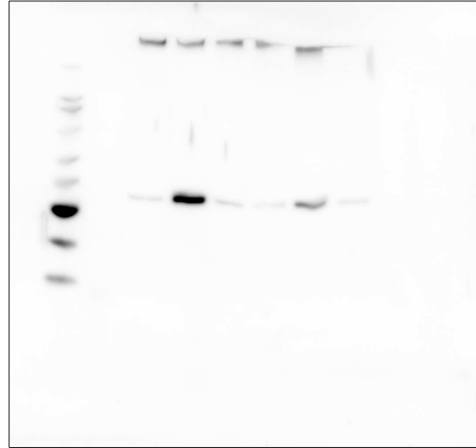

①②③④⑤⑥

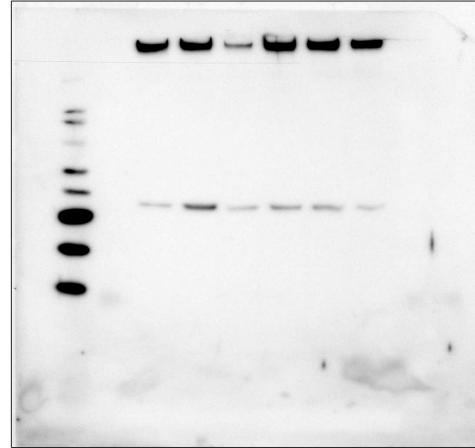

- ① 64 kPa-control
- ② 64 kPa-TGF
- ③ 64 kPa-TGF+FGF-2
- ④ 0.2 kPa-control
- ⑤ 0.2 kPa-TGF
- ⑥ 0.2 kPa-TGF+FGF-2

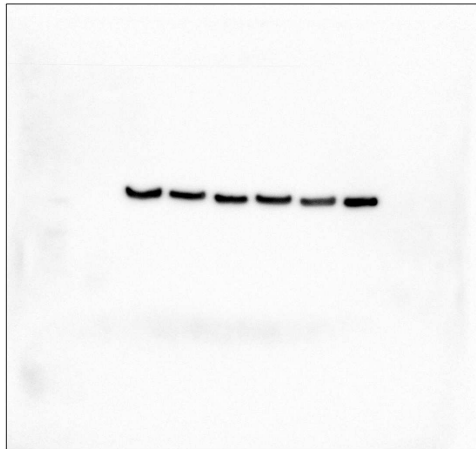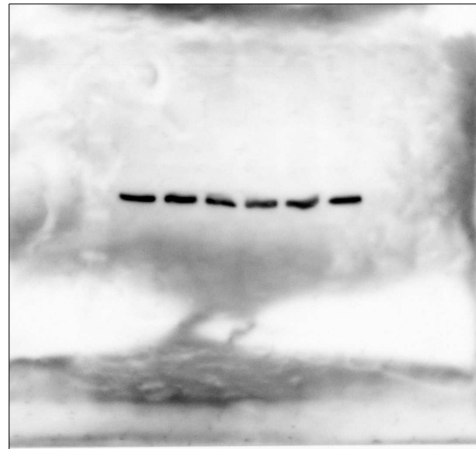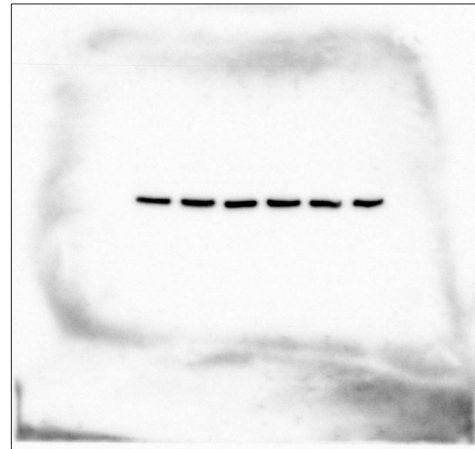

# Figure 5-D

Top: Col I  
Bottom:  $\beta$ -actin

used for figure

①②③④⑤⑥⑦⑧⑨

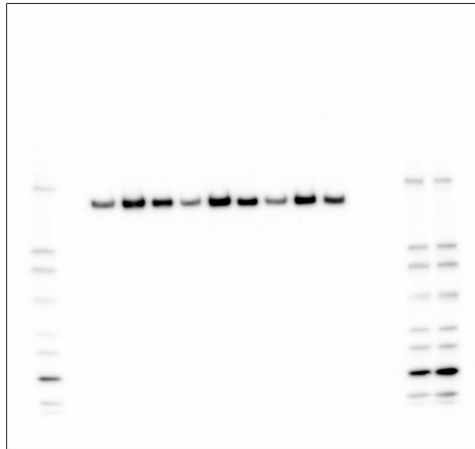

①②③④⑤⑥⑦⑧⑨

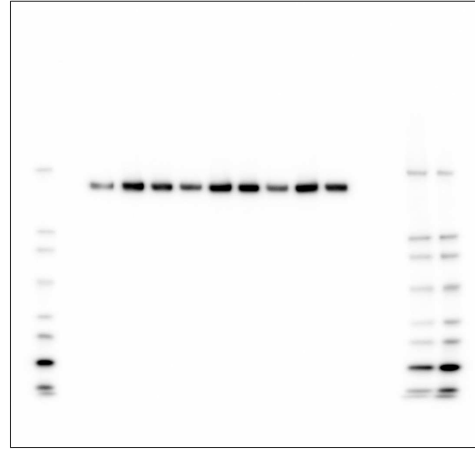

①②③④⑤⑥⑦⑧⑨

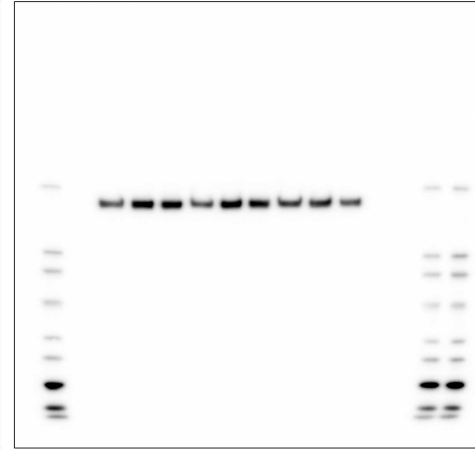

- ① 6well-control
- ② 6well-TGF
- ③ 6well-TGF+FGF-2
- ④ 64 kPa-control
- ⑤ 64 kPa-TGF
- ⑥ 64 kPa-TGF+FGF-2
- ⑦ 0.2 kPa-control
- ⑧ 0.2 kPa-TGF
- ⑨ 0.2 kPa-TGF+FGF-2

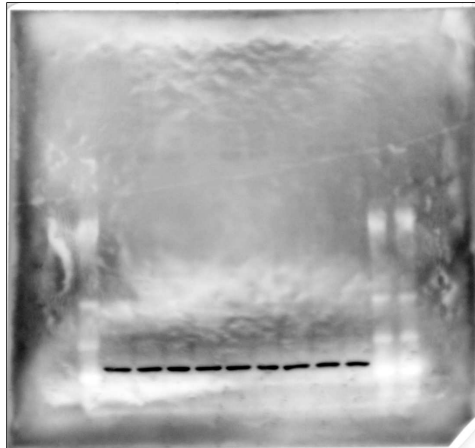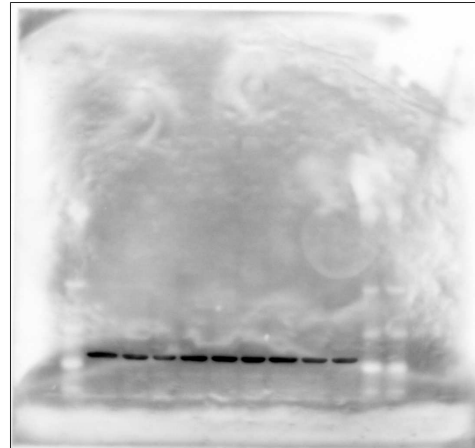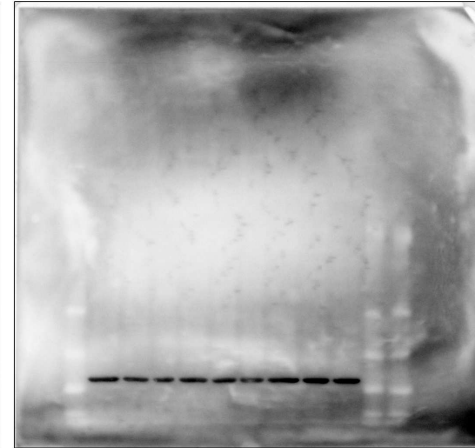

# Figure 5-E

Top: FN  
Bottom:  $\beta$ -actin

used for figure

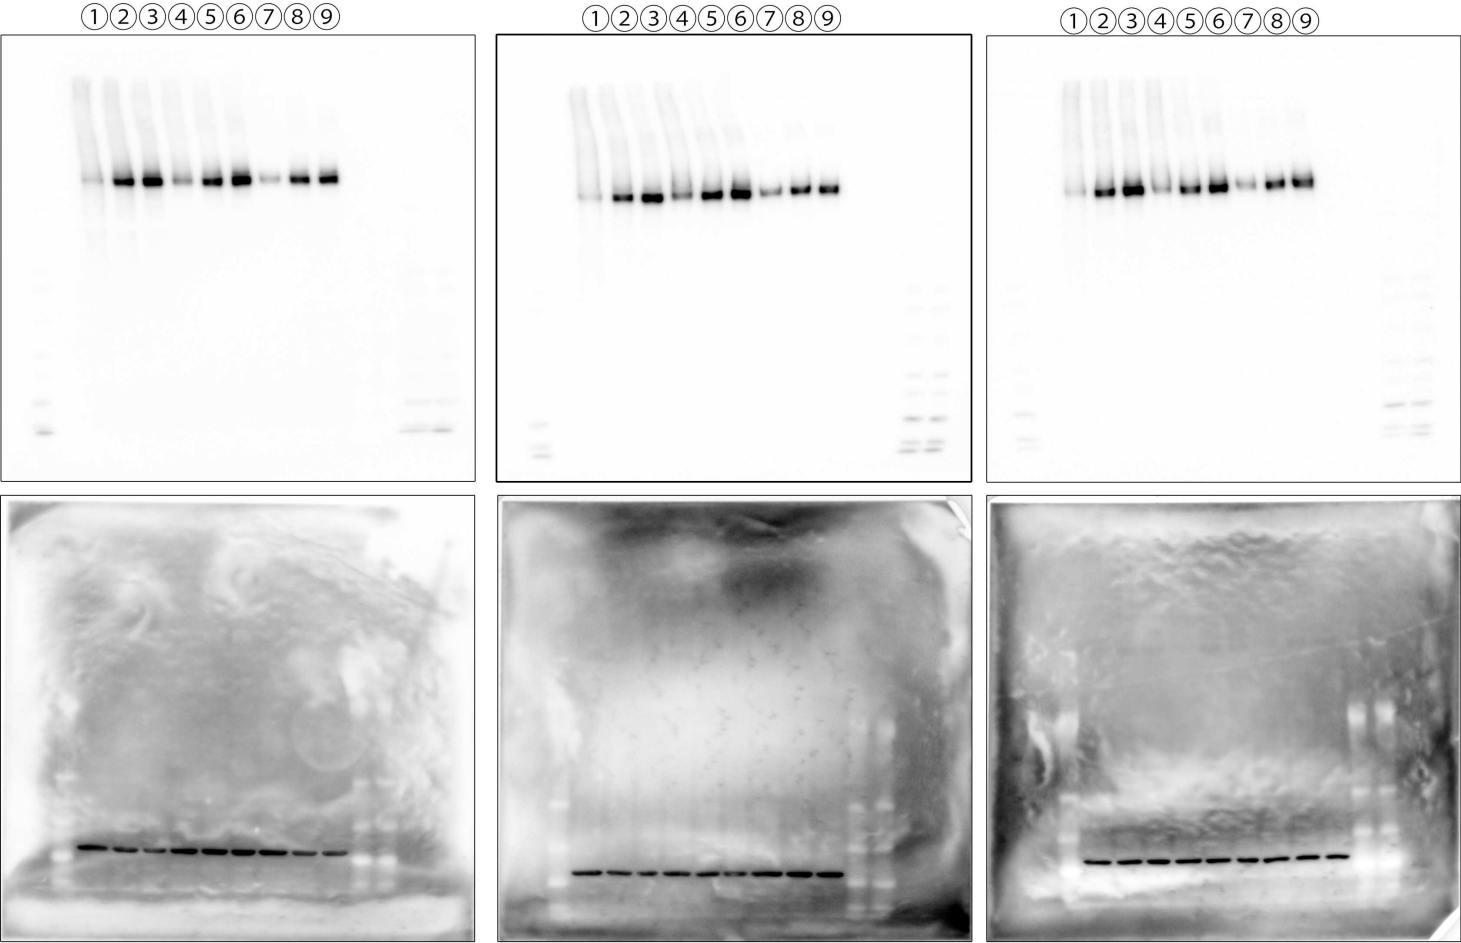

**Figure 6-A** Top: YAP (70 kDa)  
Bottom:  $\beta$ -actin

used for figure

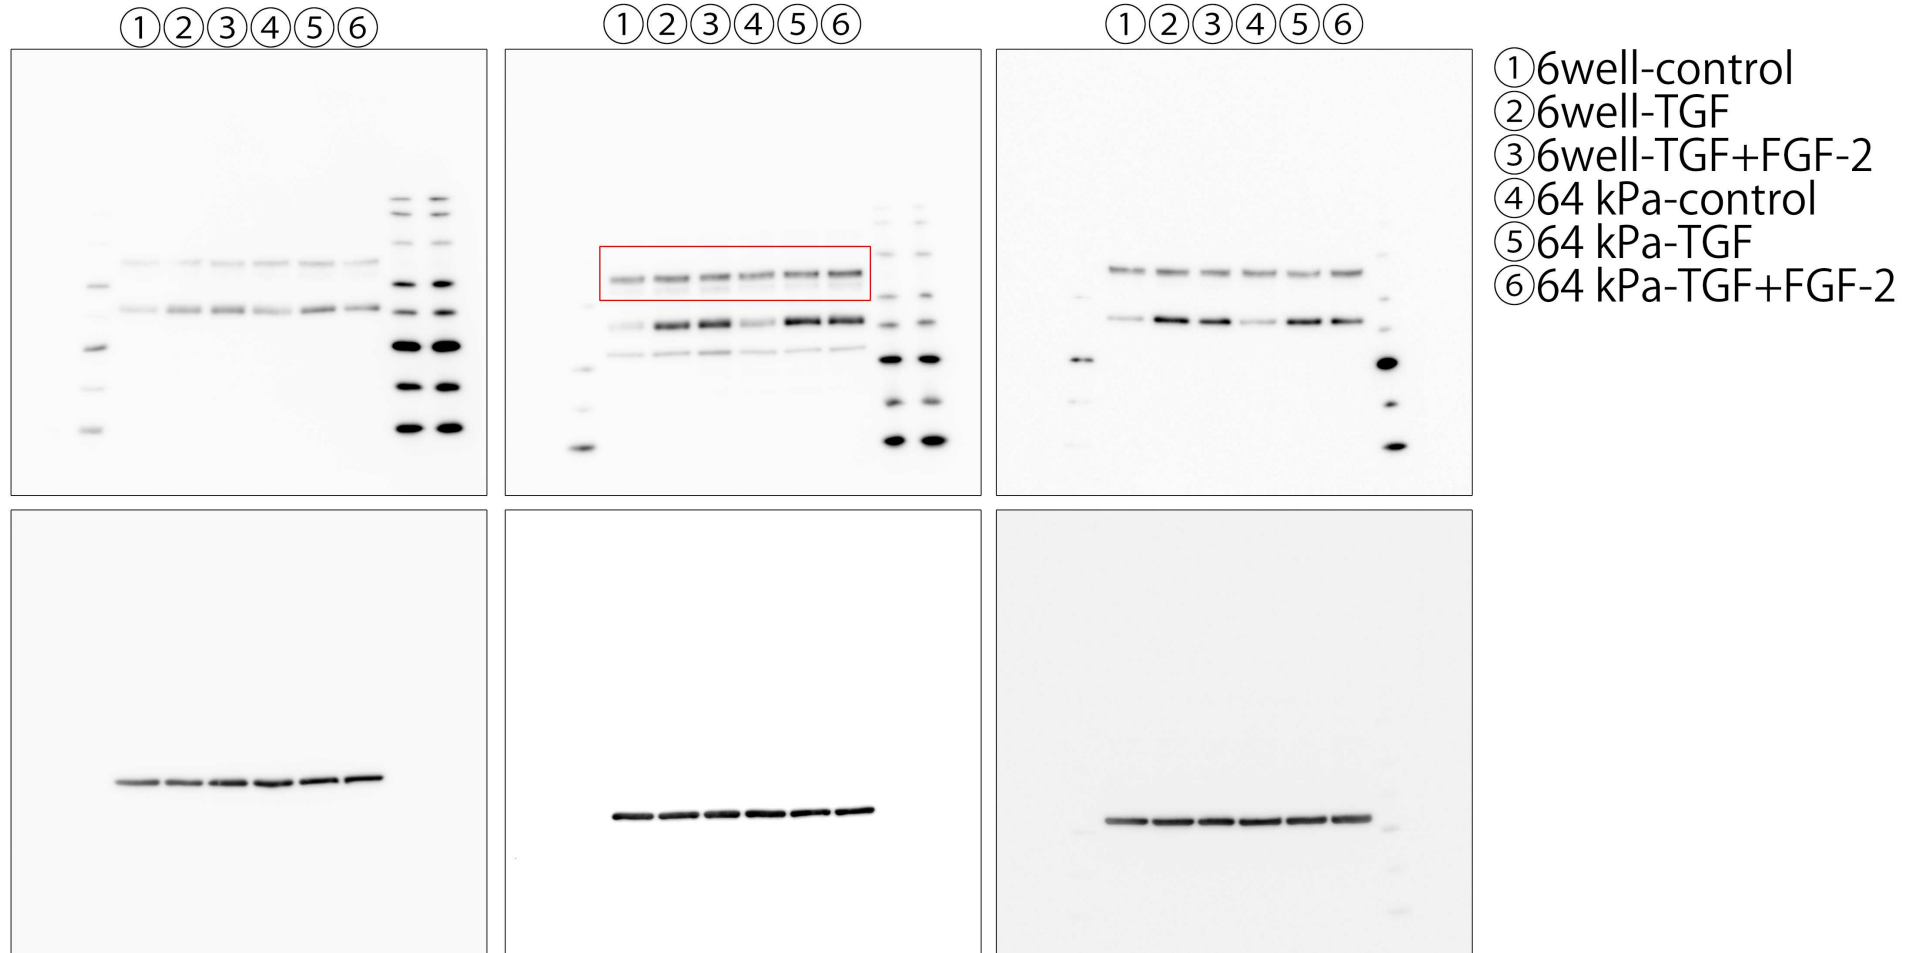

Figure 6-B

Top: YAP (70kDa)  
Bottom:  $\beta$ -actin

used for figure

①②③④⑤⑥

①②③④⑤⑥

①②③④⑤⑥

- ① 6well-control
- ② 6well-TGF
- ③ 6well-TGF+FGF-2
- ④ 0.2 kPa-control
- ⑤ 0.2 kPa-TGF
- ⑥ 0.2 kPa-TGF+FGF-2

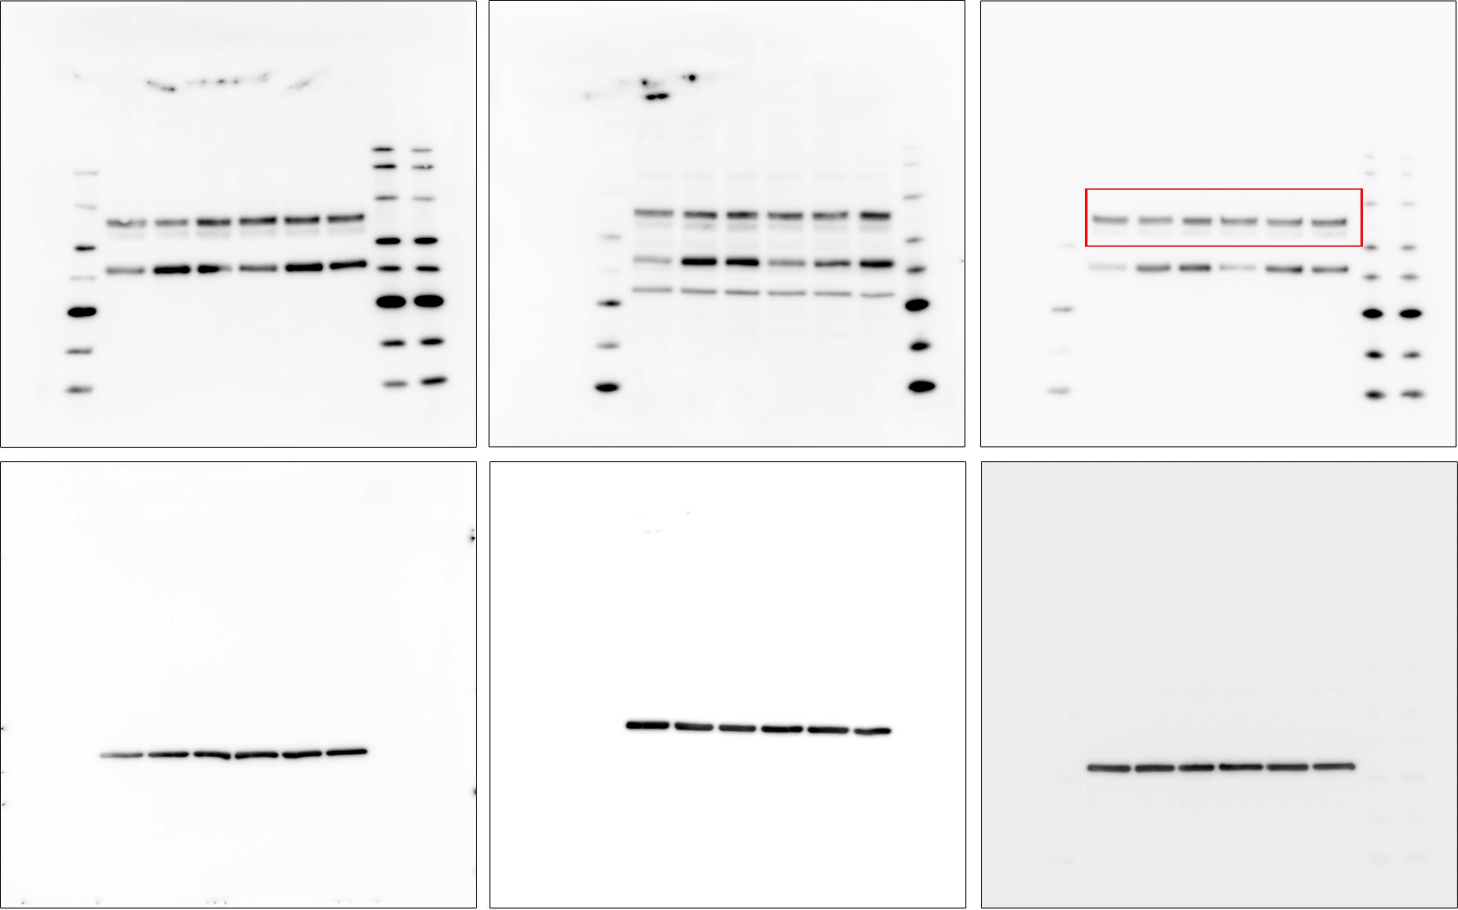

# Figure 6-C

Top: TAZ  
Bottom:  $\beta$ -actin

used for figure

①②③④⑤⑥

①②③④⑤⑥

①②③④⑤⑥

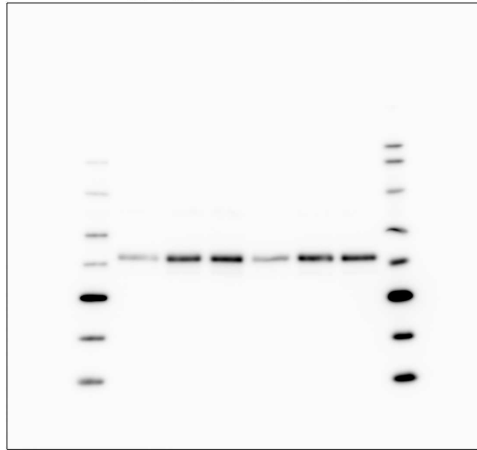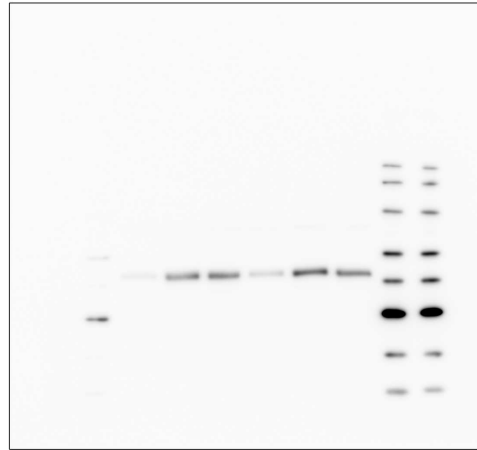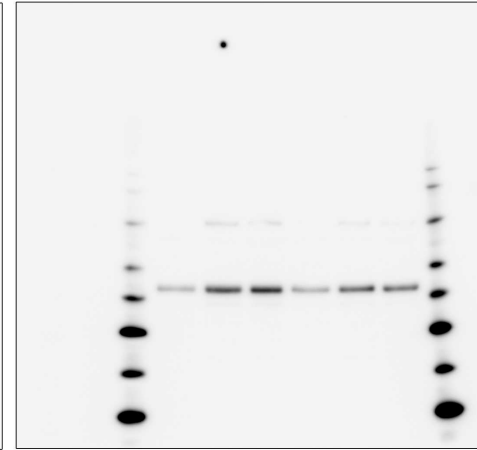

- ① 6well-control
- ② 6well-TGF
- ③ 6well-TGF+FGF-2
- ④ 64 kPa-control
- ⑤ 64 kPa-TGF
- ⑥ 64 kPa-TGF+FGF-2

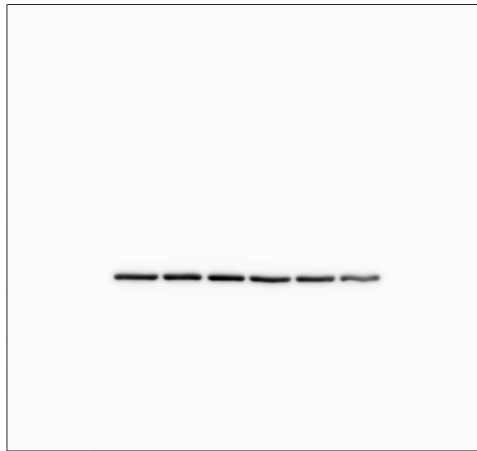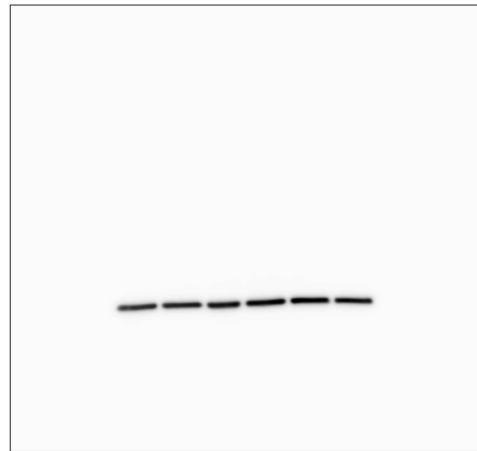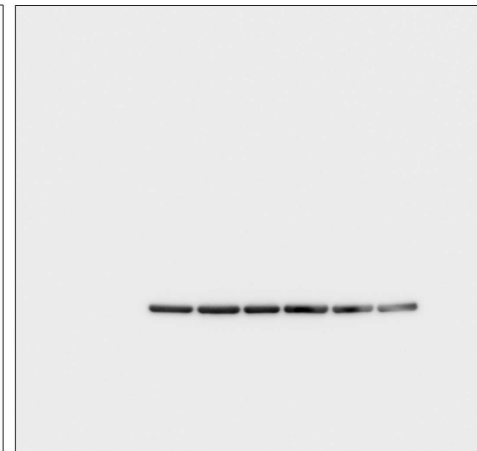

# Figure 6-D

Top: TAZ  
Bottom:  $\beta$ -actin

used for figure

①②③④⑤⑥

①②③④⑤⑥

①②③④⑤⑥

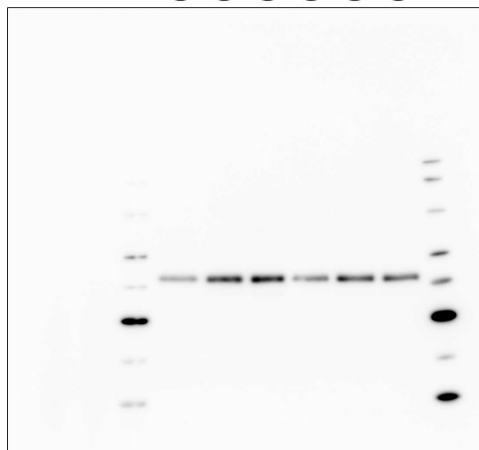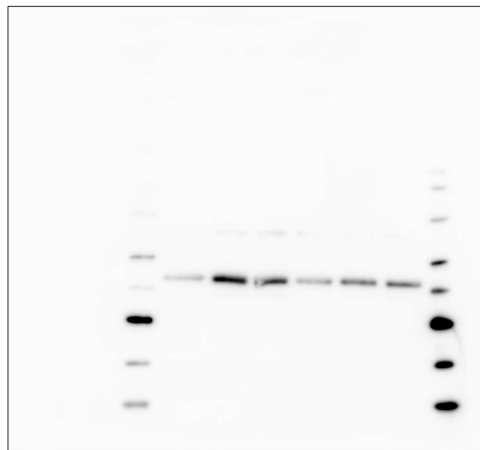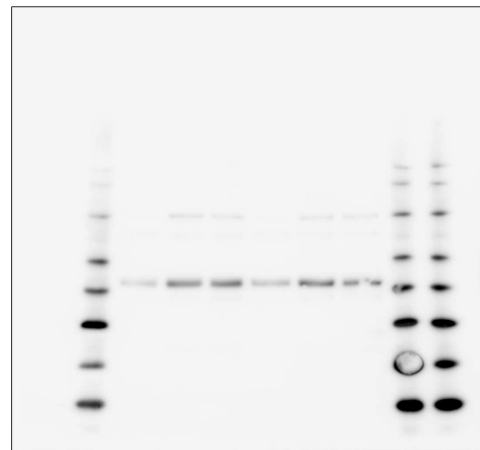

- ① 6well-control
- ② 6well-TGF
- ③ 6well-TGF+FGF-2
- ④ 0.2 kPa-control
- ⑤ 0.2 kPa-TGF
- ⑥ 0.2 kPa-TGF+FGF-2

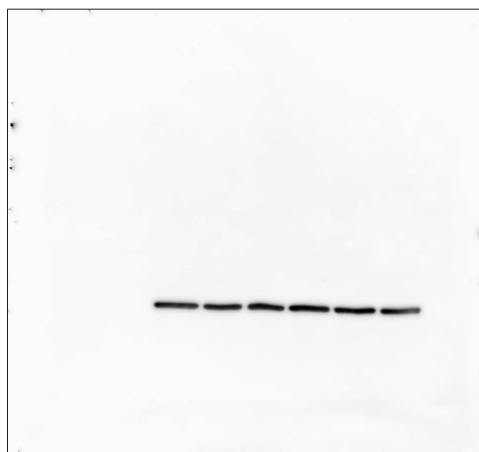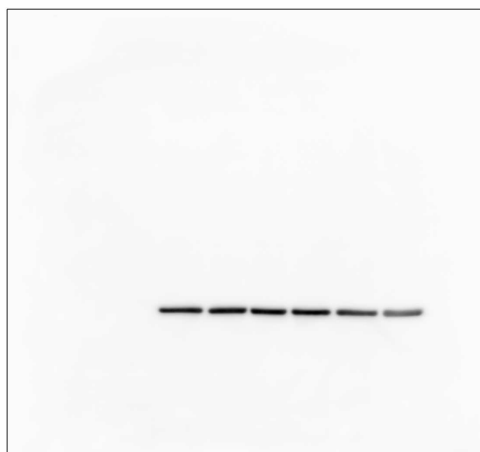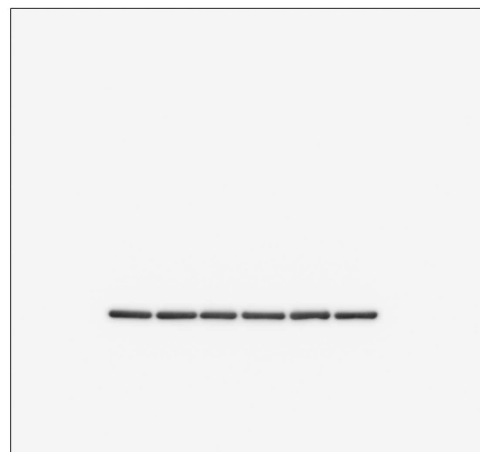

Supplement: pone.0242626.s001.pdf [file pone.0242626.s001.pdf]
